# Three-Dimensional, Tomographic Super-Resolution Fluorescence Imaging of Serially Sectioned Thick Samples

Siddharth Nangneri<sup>1</sup>, Benjamin Flottmann<sup>2</sup>, Heinz Horstmann<sup>1</sup>, Mike Heilemann<sup>2,3\*</sup>, Thomas Kuner<sup>1\*</sup>

**1** Institute of Anatomy and Cell Biology, Heidelberg University, Heidelberg, Germany, **2** Bioquant Centre, University of Heidelberg, Heidelberg, Germany, **3** Biotechnology & Biophysics, Julius-Maximilians-University Würzburg, Würzburg, Germany

## Abstract

Three-dimensional fluorescence imaging of thick tissue samples with near-molecular resolution remains a fundamental challenge in the life sciences. To tackle this, we developed *tomo*STORM, an approach combining single-molecule localization-based super-resolution microscopy with array tomography of structurally intact brain tissue. Consecutive sections organized in a ribbon were serially imaged with a lateral resolution of 28 nm and an axial resolution of 40 nm in tissue volumes of up to 50  $\mu\text{m} \times 50 \mu\text{m} \times 2.5 \mu\text{m}$ . Using targeted expression of membrane bound (m)GFP and immunohistochemistry at the calyx of Held, a model synapse for central glutamatergic neurotransmission, we delineated the course of the membrane and fine-structure of mitochondria. This method allows multiplexed super-resolution imaging in large tissue volumes with a resolution three orders of magnitude better than confocal microscopy.

**Citation:** Nangneri S, Flottmann B, Horstmann H, Heilemann M, Kuner T (2012) Three-Dimensional, Tomographic Super-Resolution Fluorescence Imaging of Serially Sectioned Thick Samples. PLoS ONE 7(5): e38098. doi:10.1371/journal.pone.0038098

**Editor:** Markus Sauer, Julius-Maximilians-University Würzburg, Germany

**Received:** March 22, 2012; **Accepted:** May 3, 2012; **Published:** May 25, 2012

**Copyright:** © 2012 Nangneri et al. This is an open-access article distributed under the terms of the Creative Commons Attribution License, which permits unrestricted use, distribution, and reproduction in any medium, provided the original author and source are credited.

**Funding:** M.H. is grateful for financial support by the German Ministry of Education and Research (BMBF; FORSYS initiative, grant nr. 0315262). T.K. is supported by the CellNetworks Cluster of Excellence (EXC81). The funders had no role in study design, data collection and analysis, decision to publish, or preparation of the manuscript.

**Competing Interests:** The authors have declared that no competing interests exist.

\* E-mail: kuner@uni-heidelberg.de (TK); m.heilemann@uni-wuerzburg.de (MH)

## Introduction

The spatial organization of subcellular components and proteins at the nanometer scale on the level of whole cells or tissues is challenging for modern light microscopy methods. Well-established light microscopy techniques are capable of imaging large volumes, yet limited in their spatial resolution to about 200 nm in the imaging plane and  $>500$  nm along the optical axis. A superior axial resolution was demonstrated through ‘array tomography’, a technique which starts off with the preparation of ultrathin sections of tissue that are labeled via immunofluorescence and imaged using widefield or confocal microscopy [1]. This technique allowed imaging of thick samples with an axial resolution of 50 nm, determined by the thickness of the sections. Super-resolution fluorescence microscopy techniques can reach near-molecular spatial resolution down to tens of nanometers [2,3] and several concepts with superior lateral and axial resolution have been demonstrated [3,4,5,6]. However, reaching an almost isotropic resolution in 3D covering large volumes with a thickness of several micrometers is still demanding, yet necessary to study proteins in their native environment on the scale of entire cellular compartments, cells and tissues. A proof of principle using serial sectioning and STED microscopy attained a lateral resolution of 80 nm and an axial resolution of 70 nm, covering a volume of  $3 \mu\text{m} \times 3 \mu\text{m} \times 1 \mu\text{m}$  [7].

In the current study, we investigated the calyx of Held, a sample that illustrates particularly well the requirements of imaging methods in terms of imaging volume and resolution. The calyx of Held is a glutamatergic presynaptic terminal located in the

auditory pathway [8,9]. This axo-somatic giant terminal engulfs a spherical cell of  $\sim 20 \mu\text{m}$  diameter and contains 300–600 active zones for neurotransmitter release [10,11,12]. The calyx of Held can be considered the best studied glutamatergic synapse in the mammalian brain as it offers unique opportunities to link structure to function. Key questions regarding the nano-geometry of protein localization within active zones await 3D super-resolution microscopy to be addressed. Nano-geometry implies to locate several presynaptic proteins at once within a small area such as the active zone, a specialized compartment with a diameter of a few hundred nanometers. Knowing the exact positioning and copy number of proteins at the active zone will provide new insights into the mechanisms of synaptic transmission. Furthermore, it is essential to locate the plasma membrane and other functionally relevant organelles such as mitochondria in the context of active zone nano-geometry.

Here, we present an approach that combines array tomography and single-molecule localization-based super-resolution imaging with photoswitchable organic fluorophores following the protocol for direct stochastic optical reconstruction microscopy (*d*STORM) [13], which we termed *tomo*STORM. 2D *d*STORM imaging provides a lateral spatial resolution of  $\sim 28$  nm at an image size of up to  $50 \times 50 \mu\text{m}^2$ . Array tomography provides an axial resolution of 40 nm or even less by virtue of the section thickness. By imaging many consecutive sections, *tomo*STORM can cover large 3D volumes spanning tens of micrometers in all directions.

Super-resolution microscopy at near molecular resolution must consider the extent of tissue preservation. Because it is known that

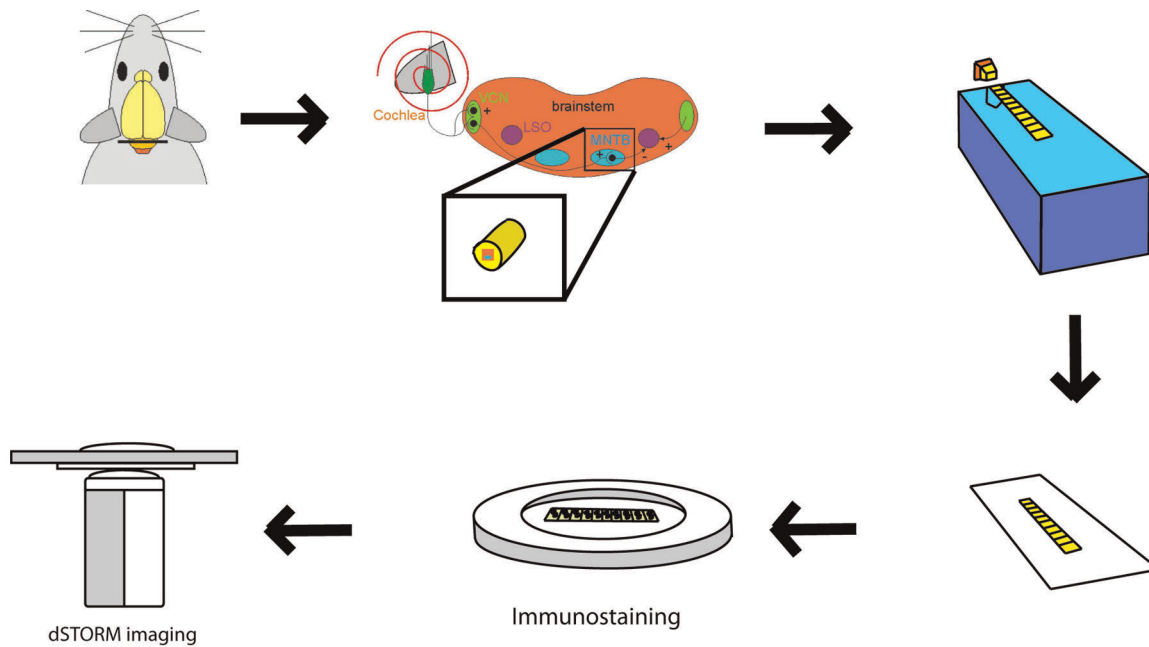

**Figure 1. Schematic drawing of the experimental approach (see main text for further details).**  
doi:10.1371/journal.pone.0038098.g001

LR-White embedding results in poor tissue preservation [14], the established array tomography approach [1] may not be appropriate to obtain meaningful protein localization data on the nanometer scale. Hence, fixation procedures and embedding resins conferring better tissue preservation need to be explored for their suitability for super-resolution imaging. Hydrophilic resins such as Lowicryl K4M, LR Gold and glycol methacrylate have been tested, with the latter providing the best compromise in maintaining genetically encoded fluorescence, reliably sectioning tissue at 70 nm thickness and ultrastructural preservation sufficient to resolve synaptic vesicles [15]. Here, we combine transcatheter perfusion with PFA and embedding with the hydrophilic Lowicryl HM20 resin to obtain serial sections with a thickness below 50 nm and good ultrastructural preservation.

In summary, we introduce *tomoSTORM*, a method that can sample multiple labels in large tissue volumes with a resolution of 28 nm×28 nm×40 nm.

## Results

The experimental approach of *tomoSTORM* starts with the preparation of serial sections that are cut from PFA-fixed tissue embedded in a polymer resin. These ribbon-like structures are transferred onto a glass substrate, immunolabeled and prepared for super-resolution imaging (Fig. 1). Because structural conservation is crucial when examining tissue at near molecular resolution, different embedding media were first investigated using electron microscopy. Being aware of the suboptimal tissue preservation in LRWhite [14], we nevertheless first revisited LRWhite embedding and subsequently tested Lowicryl HM20. Both resins support immunohistochemical staining and preparation of ultrathin sections below ~50 nm thickness. We verified the level of structural conservation by electron microscopy of PFA-fixed nervous tissue. Auditory brainstem Tissue embedded with LRWhite and cut at 70 nm was largely disrupted (grainy regions and poor membrane structures, lacunar areas in Fig. 2A). A more detailed view confirms that membranes are poorly visible and that

the cytoplasm appeared to be clustered (Fig. 2C). This was consistently found in numerous attempts of tissue preparation. In contrast, neuronal tissue embedded with HM20 and cut at 40 nm revealed a well organized tissue structure (Fig. 2B) and showed all structural details expected to be present (Fig. 2D) [16]. Thus, HM20 embedding results in tissue preservation superior to LRWhite and allows thinner sections to be prepared (even <35 nm), both crucial preconditions for fluorescence imaging of tissue at near molecular resolution.

Ribbons containing 10 to 50 consecutive sections cut at a thickness of 40 nm from rat brain stem were labeled with antibodies conjugated to the photoswitchable fluorophore Alexa Fluor 647 [17]. 2D super-resolution imaging was performed using the *dSTORM* approach [13]. The localization accuracy was determined from single fluorophores that were localized multiple times (Fig. 3A, B). Each point-spread function recorded for a single fluorophore (Fig. 3A) was approximated by a Gaussian function, which next to the location of the single fluorophore provided a standard deviation of the localization of ~12 nm (Fig. 3C) and a full-width half-maximum of ~28 nm (Fig. 3D). The latter value can be interpreted as an approximate distance at which two single fluorophores can still be discriminated, and we refer to this value as lateral spatial resolution.

In a first experiment, we imaged tissue of the auditory brain stem from a rat expressing membrane bound GFP (mGFP) in the calyx of Held [10]. We chose mGFP because it is expected to reveal the course of the plasma membrane, a structure that can be easily related to known electron microscopy images of the calyx (Fig. 4). The structure of the calyx and its postsynaptic principal cell, with a diameter of approximately 20 μm, is illustrated in Figure 4A. The small box in is shown magnified to a typical electron microscopy ‘perspective’ in Figure 4B (synaptic vesicles and mitochondria lined out). These schematic views are further illustrated for the electron microscopic (Fig. 4C, D), *dSTORM* imaging of antibody-labeled mGFP (Fig. 4E, F) and wide-field light microscopy ‘perspectives’. This comparison shows that the course of the membrane is

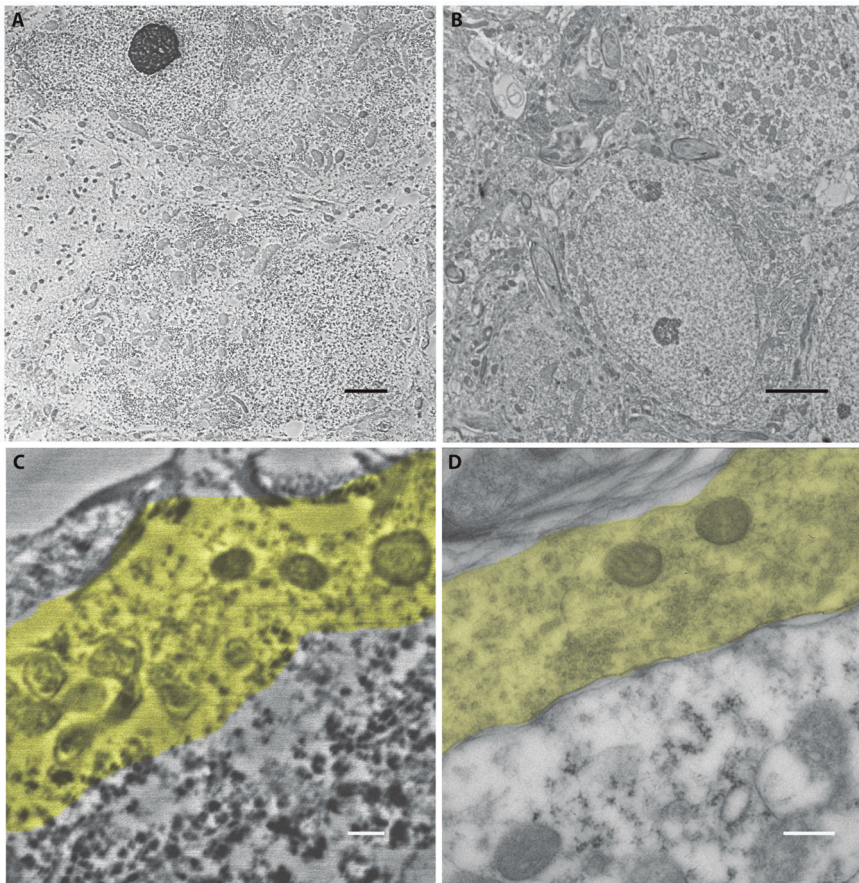

**Figure 2. Comparison of electron micrographs of LRWhite embedded tissue of the auditory brain stem (A, C) and HM 20 embedded brain tissue (B, D).** The high pressure-frozen HM 20 sections show much better ultrastructure preservation compared to LRWhite embedded sections. Scalebars in A and B 2  $\mu\text{m}$ , in C and D 250 nm.  
doi:10.1371/journal.pone.0038098.g002

adequately reproduced by imaging mGFP with *d*STORM (compare Fig. 4D and F, both at the same resolution).

A ribbon of 53 serial sections cut at a thickness of 40 nm was labeled with an anti-GFP primary antibody and a secondary antibody coupled to Alexa Fluor 647. Imaging with *d*STORM revealed consecutive sections showing continuous variations of a typical calyx structure (Fig. 5A). The inset at larger magnification allows tracing the calyx membrane in each of the images, yet every section shows a different pattern of mGFP distribution. Noticeably and in contrast to confocal microscopy [10], the super-resolution images revealed a pronounced discontinuity of membrane labeling (Fig. 5A, B). This may reflect that mGFP expressed at micromolar concentrations can only label an incomplete fraction of the available membrane surface or that the labeling efficiency of the mGFP molecules present at the membrane is inefficient. Irrespectively, *d*STORM imaging achieves a resolution which approaches the size of a biomolecule allowing single sites of mGFP expression to be distinguished. Superposition of 15 sections spanning an axial distance of 600 nm generated a continuous representation of the plasma membrane (Fig. 5C, D). To demonstrate that *tomo*STORM is capable of imaging thick samples in 3D, we recorded super-resolution images of 53 consecutive thin sections of a calyx of Held segment (movie S1). In total, this image stack covers a volume of  $40 \times 40 \times 2 \mu\text{m}^3$  with a resolution of  $28 \text{ nm} \times 28 \text{ nm} \times 40 \text{ nm}$ . A similar experiment using LRWhite as a resin did not reveal a 3D correlation of the 2D fluorescence patterns (not shown), consistent

with the disrupted ultrastructure described above. Hence, we conclude that the super-resolution images obtained from HM20-embedded tissue closely reflect the known tissue ultrastructure.

To identify the positioning of multiple structures in a single tissue volume, we modified the multi-step labeling approach used in the original array tomography approach [1]. Sections of mGFP-expressing calyces were stained against the mitochondria-specific cytochrome C and imaged (Fig. 6A). After imaging of an individual section was completed, the remaining fluorophores were photobleached at high laser intensities. In a second round, the sections were stained against mGFP and re-imaged (Fig. 6B). Because we did not observe any mGFP-positive signal within the postsynaptic cell (mGFP expression is strictly limited to the calyx), we are confident that fluorophores used in the first round of antibody labeling were photobleached completely and not transferred into a stable off-state. From these two data-sets, we were able to reconstruct a two-color super-resolution image (Fig. 6C). Dual color *tomo*STORM demonstrates a confinement of structures such as mitochondria within membranes (Fig. 6D) and fine structures of mitochondria can be readily appreciated (Fig. 6E).

We consider it important to validate super-resolution imaging data in several regards. First, electron microscopy data clearly illustrates that super-resolution microscopy requires tissue preparations maintaining excellent structural preservation (see Fig. 2). This is intuitively evident for studies aiming at localizing proteins at a resolution of  $\sim 30 \text{ nm}$ . Disrupted tissue, as encountered when



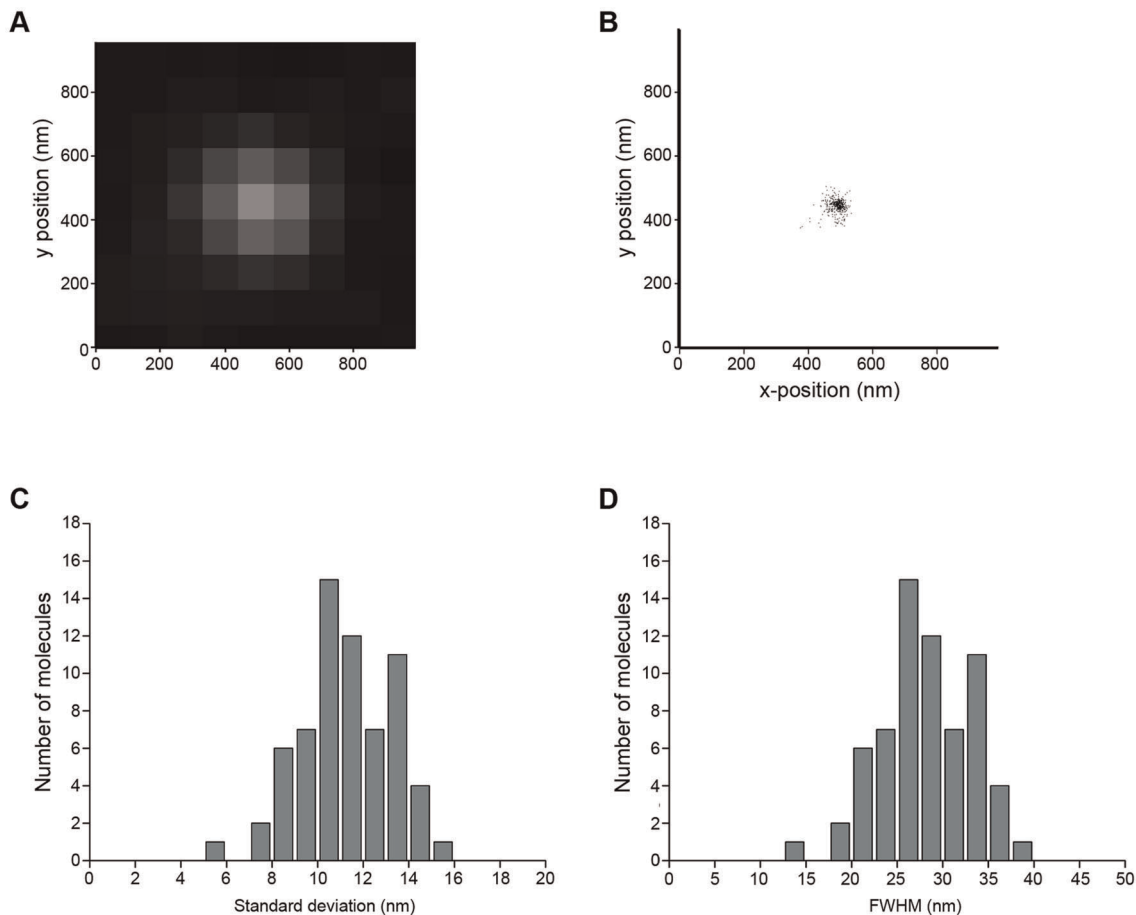

**Figure 3. Determination of the spatial resolution.** (A) point-spread function of a single fluorophore, (B) localization pattern of one single fluorophore that was localized multiple times through reversible photoswitching, (C) histogram of the standard deviation of localizations of 66 single-molecule point-spread functions (average standard deviation 12 nm) and (D) histogram of the full-width half-maximum (FWHM) of 66 single-molecule point-spread functions (average FWHM 28 nm).  
doi:10.1371/journal.pone.0038098.g003

using LRWhite resin, will not reveal interpretable localization and colocalization data. Second, cells and tissues with known ultrastructural features can be used to establish super-resolution approaches and aid in the interpretation of super-resolution images. For example, discontinuous distribution of mGFP could be established as a meaningful pattern because the shape of the calyx membrane was known. Third, immunostainings using an imaging approach with single molecule resolution require even more careful optimizations than in traditional approaches, simply because every single unspecific binding event will be detected (see Figs. 4,5). Using confocal microscopy, such signals would be invisible due to spatial averaging effects. Taken together, *tomoSTORM* is capable of providing a nanoscopic representation of tissue architecture.

## Discussion

To understand cellular processes such as synaptic transmission, it is crucial to know the molecular composition and geometrical distribution of key molecular players on the nanometer scale in three dimensions. Various super-resolution microscopy techniques can provide excellent three-dimensional resolution [3,18,19]. Single-molecule methods which apply stochastic photoswitching are particularly promising, combining super-resolution imaging with the detection of single fluorophores and thus providing access

to direct quantification. Single-molecule super-resolution imaging in 3D has been demonstrated in various approaches, e.g. using astigmatism [20], helical point-spread functions [21], interferometry [5] or dual-objective configurations [22]. Recently, 3D single-molecule super-resolution imaging was demonstrated at large sections of cultured neurons [23].

The essential idea behind *tomoSTORM* is to combine the advantages of single-molecule based super-resolution imaging with the ones of array tomography, i.e. a large field of view easily accommodating several cells, an axial resolution determined by section thickness, multiplex-labeling and structural preservation. Using *tomoSTORM*, we show for the first time super-resolution images of intact mammalian tissue at a resolution of 28 nm×28 nm×40 nm. This is three orders of magnitude higher than confocal microscopy, two orders of magnitude higher than the classic approach of array tomography [1,24] and one order of magnitude higher than STED microscopy of serial thin sections [7]. In addition, we use bright and photostable fluorophores which provide a higher localization accuracy as e.g. fluorescent proteins which were used on single thin sections previously [6], and which were recently demonstrated in parallel imaging of six colors [25]. However, we note that both approaches can be readily combined [26] and offer benefits from orthogonal labeling strategies. Furthermore, protein tags that specifically bind small substrates labeled with organic fluorophores can be used [27].

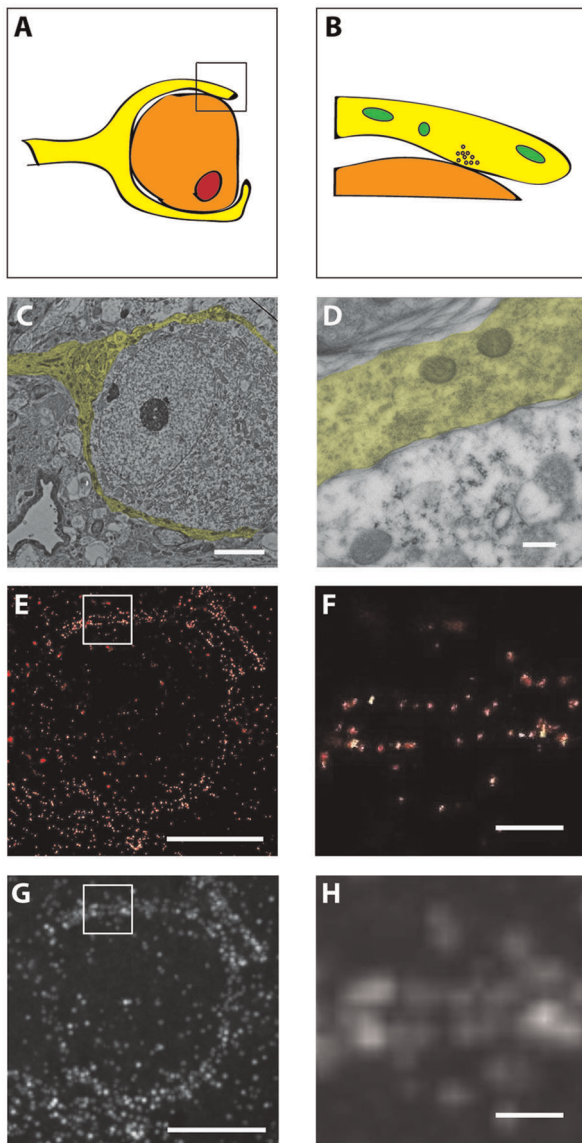

**Figure 4. Structure of the calyx of Held on an overview scale (left panels) and on the scale of synaptic contacts (right panel).** (A, B) Schematic representation, calyx (yellow), principal cell (orange), nucleus (orange). (C, D) Electron micrograph of the calyx of Held (yellow). (E, F) dSTORM images of the calyx of Held. (G, H) Widefield images of the calyx of Held. Scale bars 5  $\mu\text{m}$  (left panels), 250 nm (right panels).

doi:10.1371/journal.pone.0038098.g004

Because our approach is capable of generating hundreds of sections [1,24], there is no fundamental limit to cover thicker structures in 3D. At present, the time for imaging and data analysis is the limiting factor. Automated procedures of image acquisition and analysis might be a possible solution, such that the nanoscale distribution of proteins in entire cells and small tissue volumes can be routinely pursued. We provided proof of principle that multiple proteins can be localized simultaneously using *tomoSTORM*. Repetitive cycles of staining and destaining or bleaching will make it possible to pursue nano-toponomics: identifying the positioning and geometric arrangement of large sets of proteins. This cannot be achieved with electron microscopy and will prove to be elementary to understand the contribution of nanoscale architec-

ture to cellular function, which so far, has been the domain of models and indirect experimental inferences [28,29].

## Materials and Methods

### Sample Preparation

All experiments were conducted in accordance with the German animal welfare guidelines and approved by the responsible authority (Regierungspräsidium Karlsruhe, Germany). All necessary steps were taken to ameliorate suffering of the rats, including systemic anesthesia (isoflurane) and local wound anesthesia (lidocaine), post-surgery pain treatment, professional handling, behavioural observation and housing in individually ventilated cages at 21°C and 55% humidity. The stereotaxic injections into the ventral cochlear nucleus (VCN) of two Sprague Dawley rats and tissue processing were done as reported previously [16], but using isoflurane inhalation anesthesia [30]. The production of rAAV encoding mGFP was done as reported previously [10]. Briefly, the VCN of rats was injected with 1  $\mu\text{l}$  virus solution at P 3. After *in vivo* protein expression for the time period of 8 days rats were transcardially perfused with 20 ml of isotonic PBS followed immediately with 50 ml of 4% para formaldehyde in phosphate buffer 0.1 M pH 7.4. The brain was directly removed and stored over night at 4°C in the same fixative. 100  $\mu\text{m}$  sections were cut on a Leica VT1400 vibratome through the MNTB region and further processed as described below.

### Resin Embedding

Resin embedding with LRWhite was done as described by Micheva et al. [1]. Briefly, the fixed tissue was further immersion fixed at 4°C overnight. After rinsing with PBS the tissue was dehydrated in a graded series of ethanol until complete dehydration with 100% ethanol. The tissue was then infiltrated with LRWhite resin (three times, 5 mins at 4°C and left overnight), embedded in gelatin capsules and polymerized at 50°C.

For Lowicryl HM20, tissue sections were high pressure frozen as described [31]. Freeze substitution was performed in a mixture of 3% uranyl acetate and methanol at  $-85^{\circ}\text{C}$  for 70 h, followed by 3 washes in methanol at  $-85^{\circ}\text{C}$  after which sections were warmed upto  $-40^{\circ}\text{C}$  at  $5^{\circ}\text{C}/\text{h}$ . Tissue sections were infiltrated and embedded in Lowicryl HM20 at  $-40^{\circ}\text{C}$  and UV polymerized for 36 h at  $-40^{\circ}\text{C}$  after which temperature was raised to room temperature. UV polymerization was continued for another 24 h.

### Ribbon Making

Ultrathin sections (40 nm) were cut with an ultramicrotome (Ultracut E, Reichert Jung, NY) using the procedure described by Harris et al. [32]. The ribbons obtained were mounted on coverslips which were made hydrophilic by treatment with a mixture of 1:1 sulphuric acid and hydrogen peroxide. The ribbons were then further processed for immunostaining.

### Immunostaining

Following mounting on coverslips, the ribbons were washed in PBS (5 min) and immunostained following established protocols [33]. This was followed by blocking with 5% FCS in PBS. Primary antibodies were diluted in 5% FCS in PBS and applied on the ribbon for 2 hours. Primary antibodies used were anti-GFP (Cat# ab6556, Abcam) in 1:200 dilution, and anti-cytochrome c oxidase (Cat# C9616, Sigma, US). Samples were washed 3 times with PBS. The appropriate secondary antibody diluted in 5% FCS in PBS was applied for 30 min followed by washing in PBS for 3 times. Secondary antibodies conjugated with Alexa Fluor 647 were purchased from Invitrogen (anti-rabbit (# A21245), anti-sheep (#

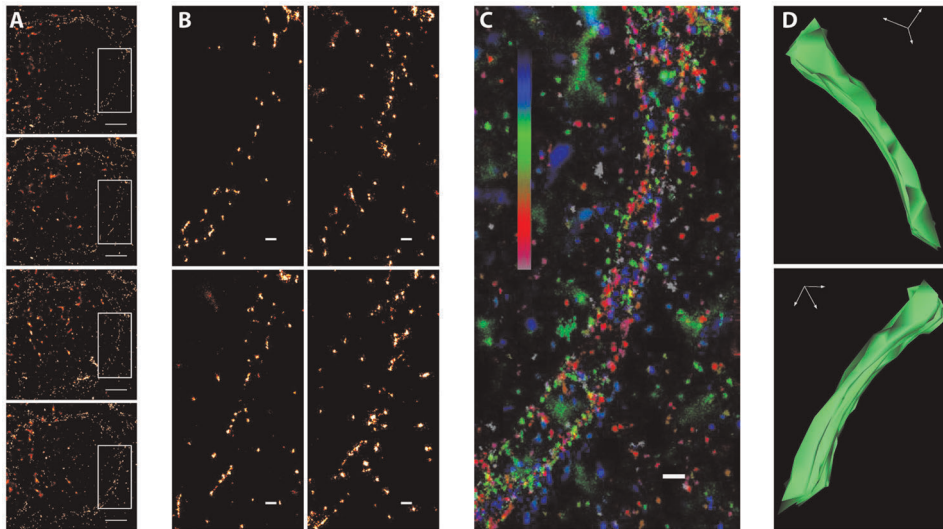

**Figure 5. mGFP outlining the calyx membrane.** (A) Four consecutive sections from a dataset of 53 sections containing segments of an entire calyx. Scale bars 2  $\mu\text{m}$ . (B) Magnified views of the boxes illustrated in (A). Scale bars 250 nm. (C) Superposition of 15 consecutive aligned sections. Z-position of each section is color coded (top: blue, bottom: velvet). Scale bar 250 nm. (D) Two 3D views of the reconstructed segment shown in (C). doi:10.1371/journal.pone.0038098.g005

A21448) and were used in the dilution 1:200 (for anti rabbit) and 1:1000 (for anti sheep). Secondary antibodies were custom-labeled with ATTO520 by conjugating the NHS ester of the fluorophore (Attotec, Germany) to unlabelled anti-rabbit antibody (#ab6016, Abcam) following the manufacturer's protocol. This antibody was used at a dilution of 1:200.

#### Electron microscopy

Electron microscopy was done following procedures described previously [16], but using 70 nm sections and no additional contrasting agents. Electron micrographs were taken with a Leo 906 E microscope.

#### dSTORM Imaging

dSTORM images were recorded on a custom-built microscope using experimental protocols that were described earlier [13].

Briefly, a multi-line laser (Innova 70C, Coherent, USA) was coupled into an inverted microscope (IX71, Olympus, Japan), and the fluorescence signal was detected using an electron-multiplying charge-coupled device (EMCCD) (Ixon, Andor, Ireland) and appropriate filters and dichroic mirrors (AHF, Tübingen, Germany). Alexa Fluor 647 was photoswitched in oxygen-free aqueous buffer containing 100 mM mercaptoethylamine and using two illumination wavelengths, 488 nm ( $0.1\text{--}1\text{ kW/cm}^2$ ) for activation and 647 nm ( $1\text{--}5\text{ kW/cm}^2$ ) for read-out. Image reconstruction was performed using the rapidSTORM software package [34]. Typically, 8000 frames were recorded to reconstruct a dSTORM image.

Dual-color dSTORM imaging was performed by sequentially imaging Alexa Fluor 647. As a first target, cytochrome c oxidase was labeled, imaged and bleached. Successful bleaching was verified in control experiments to exclude that Alexa Fluor 647 was driven into long-lived dark states and recovered to fluores-

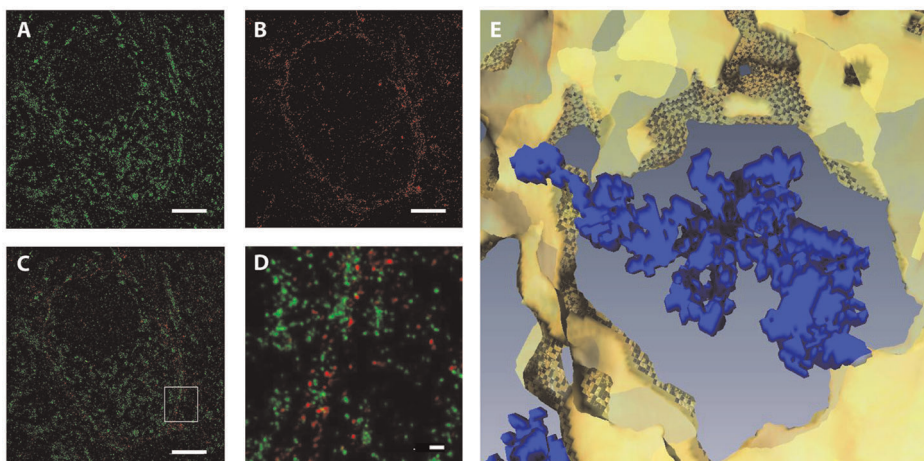

**Figure 6. Dual color dSTORM images of mitochondria and their localization within the calyx of Held.** (A) Anti-cytochrome c oxidase stain. Nucleus spared. The soma of the principal neuron is densely populated with mitochondria. (B) Anti-mGFP stain of a single section through the calyx of Held. (C) Overlay of (A) and (B). (D) 3D rendering of a mitochondrion (blue) and surrounding membrane (yellow). Scale bars are 250 nm. doi:10.1371/journal.pone.0038098.g006



cence. In a next round, the ribbon was stained for anti GFP with Alexa 647 and imaged. For alignment of the *d*STORM images, we recorded wide field images of mGFP distribution in each of these steps. To achieve this in the first step, mGFP was stained and visualized with ATTO520.

### Image Reconstruction

The localization files containing the final super-resolved images were aligned using the MultiStackReg plugin of ImageJ [35]. The MultiStackReg plugin works by performing cross-correlations between pairs of adjacent images in the stack. It applies a transformation to one image and adjusts the parameters of the transformation to maximize the cross-correlation between the two adjacent images. To achieve dual color super resolution imaging, staining of the membrane-bound GFP (mGFP) was carried out using both Alexa Fluor 647 (used for *d*STORM) and ATTO520 (standard resolution image used as reference image for registering multiple channels). By way of reference images, registration between two distinct (cytochrome c and mGFP) super-resolution channels could be achieved. The aligned and surface rendered image stacks were visualized in 3D using Amira 4.1.2 software (Visage Imaging, Richmond, Victoria, Australia) (see also Figure S1).

### Supporting Information

**Movie S1** Calyces of Held expressing mGFP. 53 consecutive sections imaged with *d*STORM covering a volume of  $\sim 50 \mu\text{m} \times 40 \mu\text{m} \times 2 \mu\text{m}$ . (MOV)

**Figure S1** Image registration procedure for one-color imaging. In a first step (i), the sum-TIRF images of individual sections were

registered using MultiStackReg [35], producing a transformation matrix for consecutive sections. In a second step (ii), the transformation matrix was applied to register the corresponding super-resolution images of consecutive sections. (B) Image registration procedure for two-color imaging. As a reference image, a cellular structure was recorded in a spectrally separate channel for each section and prior to super-resolution imaging (i). The super-resolution image of the same section was recorded on another spectral channel, and after the recording, the fluorophores were photobleached. To image a second structure, the sample was re-stained, and the series of sections was recorded following the same procedure (ii). Registration of each super-resolution stack was performed using the transformation matrix obtained from registering the reference images recorded in each round of imaging (iii). As the same reference structure was used for each recording of a stack of super-resolution images, the different stacks could be overlaid.

(TIF)

### Acknowledgments

We would like to thank Christoph Körber for help with stereotaxic injections, experimental advice and critically reading the manuscript. We thank Christian Kempf for exchange of materials and advice, Michaela Kaiser and Claudia Kocksch for superb technical assistance. We also wish to thank Jacomine Krinjse Locker (CellNetworks EM facility) for help with High Pressure Freezing.

### Author Contributions

Conceived and designed the experiments: MH TK. Performed the experiments: SN BF HH. Analyzed the data: SN BF MH TK. Wrote the paper: MH TK.

### References

- Micheva KD, Smith SJ (2007) Array tomography: a new tool for imaging the molecular architecture and ultrastructure of neural circuits. *Neuron* 55: 25–36.
- Hell SW (2009) Microscopy and its focal switch. *Nat Methods* 6: 24–32.
- Schermelleh L, Heintzmann R, Leonhardt H (2010) A guide to super-resolution fluorescence microscopy. *J Cell Biol* 190: 165–175.
- Schmidt R, Wurm CA, Punge A, Egner A, Jakobs S, et al. (2009) Mitochondrial cristae revealed with focused light. *Nano Lett* 9: 2508–2510.
- Shtengel G, Galbraith JA, Galbraith CG, Lippincott-Schwartz J, Gillette JM, et al. (2009) Interferometric fluorescent super-resolution microscopy resolves 3D cellular ultrastructure. *Proc Natl Acad Sci U S A* 106: 3125–3130.
- Betzig E, Patterson GH, Sougrat R, Lindwasser OW, Olenych S, et al. (2006) Imaging intracellular fluorescent proteins at nanometer resolution. *Science* 313: 1642–1645.
- Punge A, Rizzoli SO, Jahn R, Wildanger JD, Meyer L, et al. (2008) 3D reconstruction of high-resolution STED microscope images. *Microscopy Research and Technique* 71: 644–650.
- Schneggenburger R, Forsythe ID (2006) The calyx of Held. *Cell Tissue Res* 326: 311–337.
- von Gersdorff H, Borst JG (2002) Short-term plasticity at the calyx of held. *Nat Rev Neurosci* 3: 53–64.
- Dondzillo A, Satzler K, Horstmann H, Altmann WD, Gundelfinger ED, et al. (2010) Targeted three-dimensional immunohistochemistry reveals localization of presynaptic proteins Bassoon and Piccolo in the rat calyx of Held before and after the onset of hearing. *J Comp Neurol* 518: 1008–1029.
- Satzler K, Sohl LF, Bollmann JH, Borst JG, Frotscher M, et al. (2002) Three-dimensional reconstruction of a calyx of Held and its postsynaptic principal neuron in the medial nucleus of the trapezoid body. *J Neurosci* 22: 10567–10579.
- Taschenberger H, Leao RM, Rowland KC, Spirou GA, von Gersdorff H (2002) Optimizing synaptic architecture and efficiency for high-frequency transmission. *Neuron* 36: 1127–1143.
- Heilemann M, van de Linde S, Schuppelz M, Kasper R, Seefeldt B, et al. (2008) Subdiffraction-resolution fluorescence imaging with conventional fluorescent probes. *Angew Chem Int Ed Engl* 47: 6172–6176.
- Malecki M, Small JV (1987) Immunocytochemistry of Contractile and Cytoskeletal Proteins in Smooth-Muscle – Lowicryl, Lr White, and Polyvinylalcohol Compared. *Protoplasma* 139: 160–169.
- Watanabe S, Punge A, Hoppeler G, Willig KI, Hobson RJ, et al. (2011) Protein localization in electron micrographs using fluorescence nanoscopy. *Nat Methods* 8: 80–84.
- Wimmer VC, Nevin T, Kuner T (2004) Targeted in vivo expression of proteins in the calyx of Held. *Pflügers Arch* 449: 319–333.
- Heilemann M, Margeat E, Kasper R, Sauer M, Tinnefeld P (2005) Carbocyanine dyes as efficient reversible single-molecule optical switch. *Journal of the American Chemical Society* 127: 3801–3806.
- Heilemann M (2010) Fluorescence microscopy beyond the diffraction limit. *J Biotechnol* 149: 243–251.
- Chao J, Ram S, Ward ES, Ober RJ (2009) A comparative study of high resolution microscopy imaging modalities using a three-dimensional resolution measure. *Opt Express* 17: 24377–24402.
- Huang B, Jones SA, Brandenburg B, Zhuang X (2008) Whole-cell 3D STORM reveals interactions between cellular structures with nanometer-scale resolution. *Nat Methods* 5: 1047–1052.
- Pavani SR, Thompson MA, Biteen JS, Lord SJ, Liu N, et al. (2009) Three-dimensional, single-molecule fluorescence imaging beyond the diffraction limit by using a double-helix point spread function. *Proc Natl Acad Sci U S A* 106: 2995–2999.
- Ram S, Prabhat P, Ward ES, Ober RJ (2009) Improved single particle localization accuracy with dual objective multifocal plane microscopy. *Opt Express* 17: 6881–6898.
- Lakadamyali M, Babcock H, Bates M, Zhuang X, Lichtman J (2012) 3D multicolor super-resolution imaging offers improved accuracy in neuron tracing. *PLoS One* 7: e30826.
- Micheva KD, Busse B, Weiler NC, O'Rourke N, Smith SJ (2010) Single-synapse analysis of a diverse synapse population: proteomic imaging methods and markers. *Neuron* 68: 639–653.
- Bates M, Dempsey GT, Chen KH, Zhuang X (2012) Multicolor super-resolution fluorescence imaging via multi-parameter fluorophore detection. *Chemphyschem* 13: 99–107.
- Endesfelder U, Malkusch S, Flottmann B, Mondry J, Liguzinski P, et al. (2011) Chemically induced photoswitching of fluorescent probes—a general concept for super-resolution microscopy. *Molecules* 16: 3106–3118.
- Keppler A, Gendreizig S, Gronemeyer T, Pick H, Vogel H, et al. (2003) A general method for the covalent labeling of fusion proteins with small molecules in vivo. *Nat Biotechnol* 21: 86–89.

28. Meinrenken CJ, Borst JG, Sakmann B (2002) Calcium secretion coupling at calyx of held governed by nonuniform channel-vesicle topography. *J Neurosci* 22: 1648–1667.
29. Bucurenciu I, Kulik A, Schwaller B, Frotscher M, Jonas P (2008) Nanodomain coupling between Ca<sup>2+</sup> channels and Ca<sup>2+</sup> sensors promotes fast and efficient transmitter release at a cortical GABAergic synapse. *Neuron* 57: 536–545.
30. Schwenger DB, Kuner T (2010) Acute genetic perturbation of exocyst function in the rat calyx of Held impedes structural maturation, but spares synaptic transmission. *Eur J Neurosci* 32: 974–984.
31. Bubeck D, Filman DJ, Kuzmin M, Fuller SD, Hogle JM (2008) Post-imaging fiducial markers aid in the orientation determination of complexes with mixed or unknown symmetry. *J Struct Biol* 162: 480–490.
32. Harris KM, Perry E, Bourne J, Feinberg M, Ostroff L, et al. (2006) Uniform serial sectioning for transmission electron microscopy. *J Neurosci* 26: 12101–12103.
33. Tse FW, Tse A, Hille B, Horstmann H, Almers W (1997) Local Ca<sup>2+</sup> release from internal stores controls exocytosis in pituitary gonadotrophs. *Neuron* 18: 121–132.
34. Wolter S, Schuttpelz M, Tscherepanow M, SVDL, Heilemann M, et al. (2010) Real-time computation of subdiffraction-resolution fluorescence images. *J Microsc* 237: 12–22.
35. Micheva KD, O'Rourke N, Busse B, Smith SJ (2010) Array tomography: semiautomated image alignment. *Cold Spring Harb Protoc* 2010: pdb prot5527.
